# Supplementary material
Source: Research Square preprint supplement (doi:10.21203/rs.3.rs-9868204/v1)
Supplement: Supplementary file 1 [file 4ea0e9266daa9ee209770827.pdf]

1 **Supplementary Information for**  
2 **The urban share and regional composition of global greenhouse gas emissions**

3

4 Kevin Robert Gurney<sup>1\*</sup>, Bilal Aslam<sup>1</sup>, Pawlok Dass<sup>1</sup>, Shanthi Podhili<sup>1</sup>, Anna Kato<sup>1</sup>

5 **Affiliations**

6 <sup>1</sup>School of Informatics, Computing, and Cyber Systems, Northern Arizona University, Flagstaff,  
7 AZ, USA

8 \*Correspondence to: kevin.gurney@nau.edu

9

10 **This file includes:**

11 Supplementary Text S1 to S4

12 Tables S1 to S7

13 Figures S1 to S4

14

1 **Text S1. Urban Boundaries**

2 Three globally available urban boundaries are used in this study. The first boundary is the Global  
3 Urban Boundaries (GUB) dataset (Li et al., 2020). The second is the Global City and Town  
4 Boundaries (GCTB) dataset (Bai et al., 2025). We combine the GCTB “city” and “town”  
5 designation in this polygon dataset for the total urban set of polygons. The third polygon  
6 boundary dataset is the Functional Urban Areas (FUA) dataset (Moreno-Monroy et al., 2021).  
7 The FUA and GUB are combined to create a fourth boundary which we refer to here as the  
8 “FUGUB” boundary. It represents two conditions: 1) where a GUB boundary is partly or wholly  
9 contained within a FUA boundary the portion contained is fully eliminated from the GUB  
10 dataset; 2) GUB delineations that are partly or wholly outside of a FUA urban boundary are  
11 retained (Figure S1).

12 We explored two additional boundaries for this study though neither is used to report the urban  
13 share. The Global Administrative Areas (GADM) version 4.1 represents first the world’s  
14 administrative boundaries at a range of levels (<https://gadm.org/index.html>). The finest spatial  
15 detail that remains globally comprehensive is the GADM level 2. This boundary delineates  
16 entities such as districts, provinces and in the case of the United States, counties. Visual  
17 inspection of examples of the GADM level 2 boundaries suggests that these are not consistent  
18 with what is broadly considered urban and incorporates large portions of rural land surface.  
19 Hence, the GADM is not used in the current study.

20 The urban centre polygon set associated with the Global Human Settlement Urban Centre  
21 Database (GHS-UCDB) represents another alternative urban boundary definition (Melchiorri et  
22 al., 2024). However, in this case the polygons are restricted to urban “core” or “downtown” areas  
23 which exclude suburban or peri-urban areas (Figure S2).

24 We similarly do not use “pixel-based” definitions of urban areas such as represented by the 1  
25 km<sup>2</sup> Global Human Settlement - Settlement Model (GHS-SMOD) (Schiavina et al., 2023). The  
26 use of such pixel-based urban designations requires building the ML model around pixel  
27 emissions prediction. Attempts to do so were severely hampered by challenges of computational  
28 capacity and data volume. The limited tests that were performed resulted in large prediction  
29 errors. Hence, the choice is to only develop the GHG prediction model around the larger and  
30 more data-coherent urban polygons.

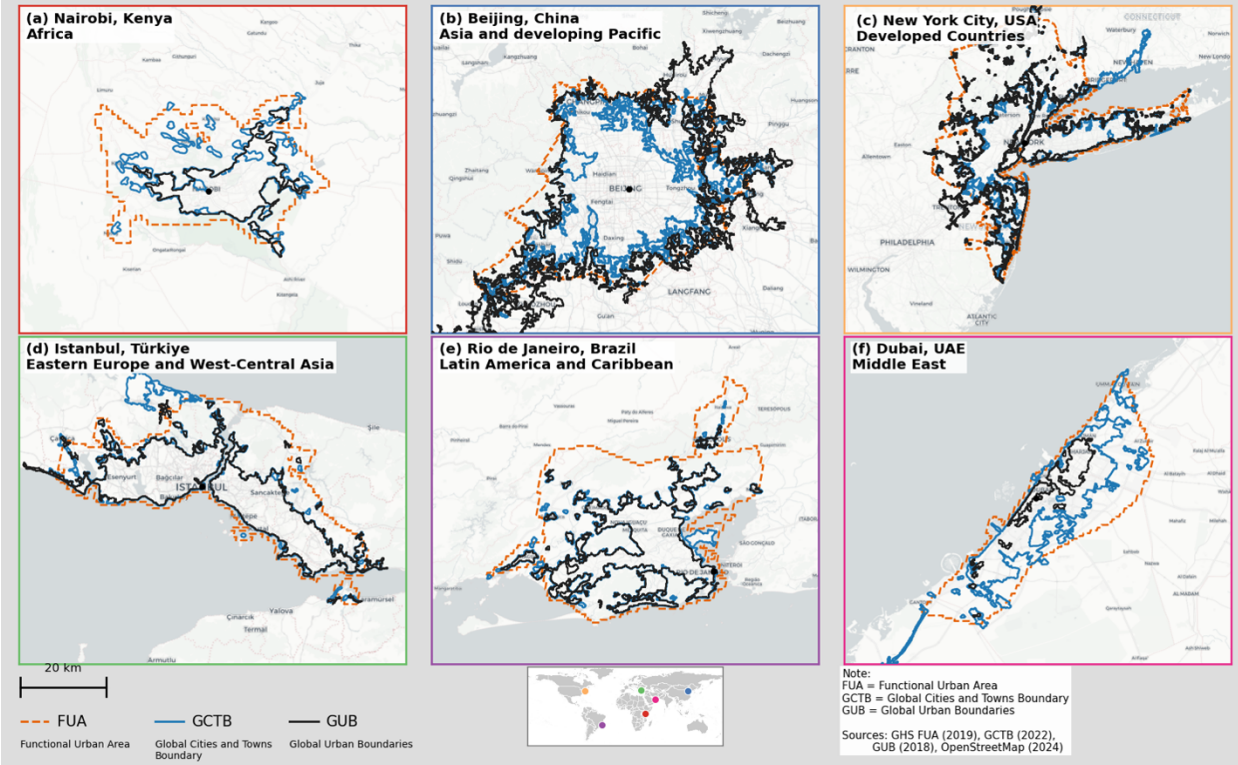

1  
 2 **Figure S1.** Example urban boundary outlines in each of the six IPCC regions. Included here are  
 3 the GUB, FUA, and GCTB boundaries. The hybrid boundary, FUGUB, uses the FUA outline  
 4 where the GUB is fully contained within the FUA, but adds GUB entities when they partly or are  
 5 wholly outside of a FUA boundary.

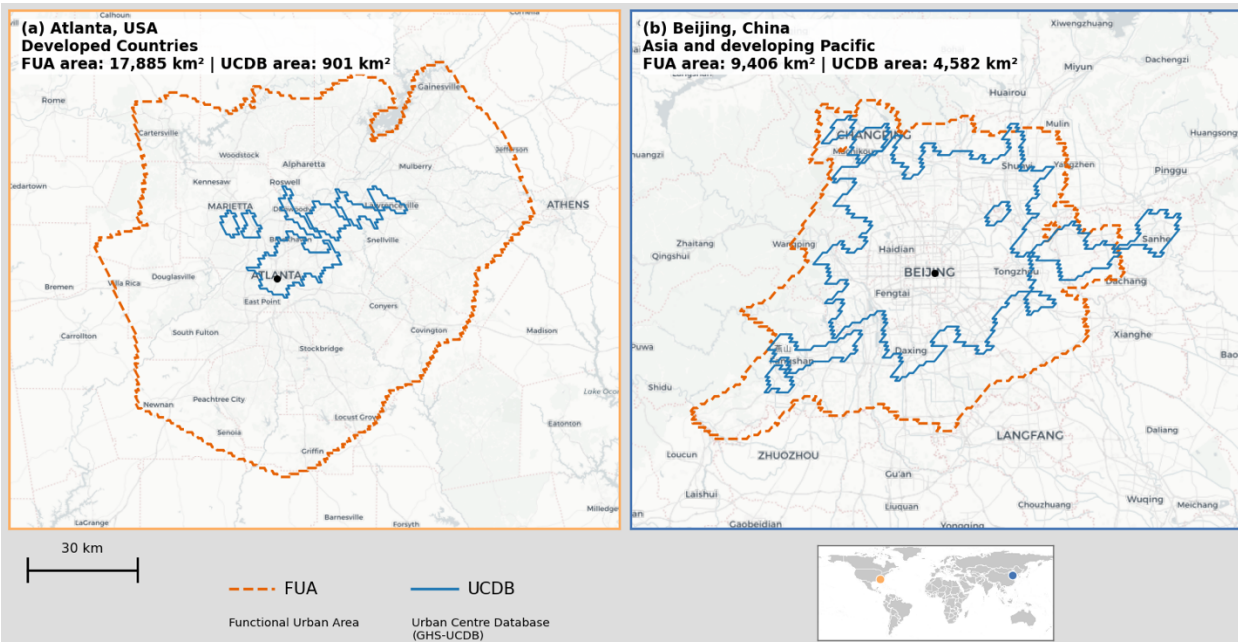

6  
 7 **Figure S2.** Contrast between the UCDB boundary reflective of the urban “core” versus the FUA  
 8 boundary.

1 **Text S2.** Annual urban FFCO<sub>2</sub> emissions

2 The main text reports the most recent year, 2022, in the complete time series of absolute urban  
 3 FFCO<sub>2</sub> emissions (GtC/year). Table S1 presents all years by the four boundaries and across the  
 4 IPCC 6-regions and the globe.

5 Though not one of the urban boundaries considered in this study, we present the urban FFCO<sub>2</sub>  
 6 emissions share for the Global Human Settlement Urban Centre DataBase (GHS-UCDB)  
 7 boundary as a point of reference for other studies that have used this urban centre boundary for  
 8 analysis (Table S2).

9 **Table S1.** Vulcan-UrbanML FFCO<sub>2</sub> emissions by year and IPCC region for three urban  
 10 boundaries.

| GUB boundary          | Africa (GtC/yr) | Asia & Developing Pacific (GtC/yr) | Developed Countries (GtC/yr) | Eastern Europe & West-Central Asia (GtC/yr) | Latin America & Caribbean (GtC/yr) | Middle East (GtC/yr) | Global (GtC/yr) |
|-----------------------|-----------------|------------------------------------|------------------------------|---------------------------------------------|------------------------------------|----------------------|-----------------|
| 2010                  | 0.17            | 2.13                               | 2.00                         | 0.26                                        | 0.20                               | 0.17                 | 4.96            |
| 2011                  | 0.17            | 2.32                               | 1.95                         | 0.27                                        | 0.20                               | 0.17                 | 4.97            |
| 2012                  | 0.17            | 2.44                               | 1.88                         | 0.27                                        | 0.21                               | 0.18                 | 5.23            |
| 2013                  | 0.18            | 2.45                               | 1.94                         | 0.27                                        | 0.22                               | 0.18                 | 5.20            |
| 2014                  | 0.19            | 2.47                               | 1.90                         | 0.26                                        | 0.22                               | 0.18                 | 5.15            |
| 2015                  | 0.18            | 2.52                               | 1.86                         | 0.26                                        | 0.22                               | 0.20                 | 5.18            |
| 2016                  | 0.19            | 2.45                               | 1.88                         | 0.27                                        | 0.21                               | 0.20                 | 5.22            |
| 2017                  | 0.18            | 2.52                               | 1.83                         | 0.28                                        | 0.21                               | 0.21                 | 5.24            |
| 2018                  | 0.19            | 2.65                               | 1.86                         | 0.29                                        | 0.20                               | 0.21                 | 5.47            |
| 2019                  | 0.20            | 2.77                               | 1.82                         | 0.28                                        | 0.20                               | 0.21                 | 5.39            |
| 2020                  | 0.19            | 2.74                               | 1.68                         | 0.27                                        | 0.19                               | 0.20                 | 5.25            |
| 2021                  | 0.20            | 2.93                               | 1.73                         | 0.29                                        | 0.21                               | 0.21                 | 5.64            |
| 2022                  | 0.20            | 2.96                               | 1.75                         | 0.29                                        | 0.21                               | 0.22                 | 5.59            |
| <b>GCTB boundary</b>  |                 |                                    |                              |                                             |                                    |                      |                 |
| 2010                  | 0.12            | 1.88                               | 1.32                         | 0.23                                        | 0.20                               | 0.20                 | 3.95            |
| 2011                  | 0.12            | 2.08                               | 1.30                         | 0.25                                        | 0.21                               | 0.21                 | 4.16            |
| 2012                  | 0.12            | 2.23                               | 1.30                         | 0.25                                        | 0.22                               | 0.23                 | 4.36            |
| 2013                  | 0.13            | 2.30                               | 1.31                         | 0.25                                        | 0.23                               | 0.22                 | 4.44            |
| 2014                  | 0.14            | 2.35                               | 1.29                         | 0.25                                        | 0.23                               | 0.24                 | 4.49            |
| 2015                  | 0.13            | 2.38                               | 1.28                         | 0.25                                        | 0.23                               | 0.25                 | 4.53            |
| 2016                  | 0.14            | 2.42                               | 1.28                         | 0.25                                        | 0.23                               | 0.26                 | 4.59            |
| 2017                  | 0.14            | 2.49                               | 1.29                         | 0.26                                        | 0.23                               | 0.26                 | 4.66            |
| 2018                  | 0.14            | 2.61                               | 1.29                         | 0.27                                        | 0.22                               | 0.27                 | 4.81            |
| 2019                  | 0.15            | 2.69                               | 1.26                         | 0.26                                        | 0.22                               | 0.28                 | 4.87            |
| 2020                  | 0.15            | 2.77                               | 1.15                         | 0.27                                        | 0.21                               | 0.26                 | 4.81            |
| 2021                  | 0.16            | 2.91                               | 1.22                         | 0.27                                        | 0.22                               | 0.27                 | 5.06            |
| 2022                  | 0.16            | 3.08                               | 1.38                         | 0.31                                        | 0.24                               | 0.29                 | 5.46            |
| <b>FUA boundary</b>   |                 |                                    |                              |                                             |                                    |                      |                 |
| 2010                  | 0.14            | 2.15                               | 1.68                         | 0.22                                        | 0.25                               | 0.23                 | 4.77            |
| 2011                  | 0.14            | 2.41                               | 1.65                         | 0.24                                        | 0.25                               | 0.24                 | 4.88            |
| 2012                  | 0.14            | 2.47                               | 1.66                         | 0.24                                        | 0.26                               | 0.25                 | 4.93            |
| 2013                  | 0.15            | 2.53                               | 1.63                         | 0.23                                        | 0.27                               | 0.25                 | 5.05            |
| 2014                  | 0.16            | 2.55                               | 1.61                         | 0.23                                        | 0.27                               | 0.26                 | 5.09            |
| 2015                  | 0.15            | 2.54                               | 1.57                         | 0.22                                        | 0.26                               | 0.28                 | 5.14            |
| 2016                  | 0.16            | 2.58                               | 1.61                         | 0.23                                        | 0.26                               | 0.28                 | 5.10            |
| 2017                  | 0.16            | 2.69                               | 1.58                         | 0.24                                        | 0.26                               | 0.28                 | 5.14            |
| 2018                  | 0.16            | 2.77                               | 1.59                         | 0.25                                        | 0.25                               | 0.29                 | 5.24            |
| 2019                  | 0.17            | 2.87                               | 1.53                         | 0.23                                        | 0.24                               | 0.29                 | 5.31            |
| 2020                  | 0.16            | 2.90                               | 1.39                         | 0.23                                        | 0.23                               | 0.28                 | 5.14            |
| 2021                  | 0.18            | 3.04                               | 1.51                         | 0.24                                        | 0.25                               | 0.28                 | 5.36            |
| 2022                  | 0.18            | 3.09                               | 1.50                         | 0.26                                        | 0.25                               | 0.30                 | 5.42            |
| <b>FUGUB boundary</b> |                 |                                    |                              |                                             |                                    |                      |                 |
| 2010                  | 0.18            | 2.23                               | 1.98                         | 0.28                                        | 0.27                               | 0.25                 | 5.18            |

|      |      |      |      |      |      |      |      |
|------|------|------|------|------|------|------|------|
| 2011 | 0.19 | 2.43 | 1.93 | 0.30 | 0.27 | 0.25 | 5.37 |
| 2012 | 0.19 | 2.53 | 1.91 | 0.30 | 0.29 | 0.27 | 5.48 |
| 2013 | 0.19 | 2.57 | 1.92 | 0.29 | 0.30 | 0.27 | 5.54 |
| 2014 | 0.21 | 2.60 | 1.89 | 0.29 | 0.30 | 0.28 | 5.56 |
| 2015 | 0.20 | 2.62 | 1.87 | 0.29 | 0.29 | 0.29 | 5.55 |
| 2016 | 0.21 | 2.63 | 1.85 | 0.29 | 0.29 | 0.30 | 5.57 |
| 2017 | 0.21 | 2.68 | 1.85 | 0.30 | 0.28 | 0.30 | 5.63 |
| 2018 | 0.21 | 2.81 | 1.86 | 0.32 | 0.27 | 0.31 | 5.78 |
| 2019 | 0.22 | 2.90 | 1.82 | 0.30 | 0.26 | 0.31 | 5.81 |
| 2020 | 0.21 | 2.92 | 1.66 | 0.30 | 0.23 | 0.30 | 5.62 |
| 2021 | 0.22 | 3.06 | 1.76 | 0.31 | 0.25 | 0.30 | 5.89 |
| 2022 | 0.22 | 3.09 | 1.75 | 0.32 | 0.26 | 0.32 | 5.96 |

1 **Table S2.** Urban share for the GHS-UCDB boundary.

| Year | Africa (%) | Asia & Developing Pacific (%) | Developed Countries (%) | Eastern Europe & West-Central Asia (%) | Latin America & Caribbean (%) | Middle East (%) | Global (%) |
|------|------------|-------------------------------|-------------------------|----------------------------------------|-------------------------------|-----------------|------------|
| 2010 | 44.4       | 50.7                          | 25.8                    | 25.5                                   | 49.2                          | 43.3            | 39.1       |
| 2011 | 46.0       | 51.0                          | 26.7                    | 25.4                                   | 47.4                          | 41.6            | 39.9       |
| 2012 | 43.6       | 51.5                          | 26.5                    | 25.7                                   | 47.7                          | 44.1            | 40.3       |
| 2013 | 42.2       | 51.2                          | 26.8                    | 25.7                                   | 48.1                          | 41.5            | 39.5       |
| 2014 | 43.0       | 51.1                          | 27.0                    | 26.3                                   | 49.2                          | 42.1            | 39.6       |
| 2015 | 42.9       | 50.4                          | 27.0                    | 25.7                                   | 47.5                          | 44.3            | 40.6       |
| 2016 | 44.1       | 51.7                          | 27.4                    | 27.3                                   | 48.3                          | 46.0            | 40.5       |
| 2017 | 44.2       | 50.2                          | 27.7                    | 27.0                                   | 46.8                          | 44.8            | 39.9       |
| 2018 | 42.3       | 50.5                          | 27.7                    | 27.3                                   | 48.0                          | 47.9            | 41.0       |
| 2019 | 45.1       | 51.3                          | 28.0                    | 25.7                                   | 47.8                          | 45.7            | 41.0       |
| 2020 | 44.2       | 52.3                          | 28.2                    | 26.1                                   | 50.9                          | 44.0            | 42.1       |
| 2021 | 46.0       | 51.7                          | 28.4                    | 24.7                                   | 50.6                          | 43.8            | 42.5       |
| 2022 | 46.4       | 51.6                          | 28.2                    | 26.6                                   | 51.9                          | 43.5            | 42.6       |

2 **Text S3.** CDP comparison

3 The results produced here were compared to a collection of curated self-reported GHG emission  
4 inventory results archived by the Carbon Disclosure Project (Nangini et al., 2019). After name  
5 and surface area matching, 77 cities, out of the original 343, remained. The comparison shows a  
6 mean relative difference for the FFCO<sub>2</sub> emissions of -13.4% ( $\pm 7.8\%$ ) where the relative  
7 difference is calculated as [CDP-Vulcan UrbanML]/mean[CDP,Vulcan UrbanML]. Because the  
8 extent of the urban boundary cannot be precisely matched (many of the urban self-reported  
9 inventories are restricted to nationally unique governance boundaries which are distinct from the  
10 boundaries used in this study), emissions intensity based on the urban area is also compared.  
11 This resulted in a mean relative difference of -5.1% ( $\pm 8.9\%$ ). This cannot be considered a form  
12 of validation as the self-reported inventories can contain large biases and the system boundaries  
13 are not consistently reported (Gurney et al., 2021). However, the relatively close mean  
14 agreement offers a check (albeit limited) on the general integrity of the Vulcan-UrbanML results.

15 **Table S3.** Population share, GDP share, land area share for the 2022 FUGUB boundary by  
16 IPCC region.

| Region                               | Pop share (%) | Urban share (%) | GDP share (%) | Area share (%) |
|--------------------------------------|---------------|-----------------|---------------|----------------|
| Africa                               | 42.8          | 69.2            | 56.9          | 0.50           |
| Asia and developing Pacific          | 54.4          | 73.0            | 72.2          | 3.88           |
| Developed Countries                  | 82.2          | 69.1            | 82.1          | 3.80           |
| Eastern Europe and West-Central Asia | 67.1          | 56.0            | 68.1          | 0.54           |
| Latin America and Caribbean          | 69.3          | 70.4            | 79.7          | 1.12           |
| Middle East                          | 66.8          | 63.7            | 79.7          | 1.30           |
| Global                               | 58.7          | 69.9            | 77.0          | 2.06           |

1 **Table S4.** Trends of absolute urban territorial FFCO<sub>2</sub> emissions, urban share, urban per capita  
 2 territorial FFCO<sub>2</sub> emissions, and absolute regional FFCO<sub>2</sub> emissions over the 2010-2022 time  
 3 period by IPCC region. ( $\pm$  standard error in parentheses).

| Region                             | Urban share trend (%/yr) | Urban percap trend (%/yr) | Urban emit trend (%/yr) | Region emit trend (%/yr) |
|------------------------------------|--------------------------|---------------------------|-------------------------|--------------------------|
| Africa                             | -0.28 (0.13)             | -0.84 (0.14)              | 1.44 (0.15)             | 1.79 (0.23)              |
| Asia & Developing Pacific          | -0.08 (0.07)             | 1.43 (0.17)               | 2.32 (0.16)             | 2.41 (0.14)              |
| Developed Countries                | 0.31 (0.02)              | -1.56 (0.16)              | -1.08 (0.16)            | -1.53 (0.17)             |
| Eastern Europe & West-Central Asia | 0.11 (0.09)              | 0.28 (0.21)               | 0.77 (0.21)             | 0.58 (0.25)              |
| Latin America & Caribbean          | -0.42 (0.09)             | -1.98 (0.41)              | -1.13 (0.44)            | -0.70 (0.46)             |
| Middle East                        | 0.21 (0.15)              | 0.00 (0.21)               | 1.93 (0.22)             | 1.66 (0.13)              |
| Global                             | 0.11 (0.03)              | -0.10 (0.11)              | 0.90 (0.08)             | 0.69 (0.14)              |

4 **Text S4.** Method details

5 The urban share analysis in this study is based on a machine learning (ML) approach to estimate  
 6 urban FFCO<sub>2</sub> emissions globally. This method includes different geospatial input datasets,  
 7 harmonized to the same grid/pixel resolution. These datasets are aggregated to four urban  
 8 polygon definitions and trained on United States Vulcan version 4.0 territorial FFCO<sub>2</sub> emissions  
 9 similarly aggregated to the same urban polygon definitions across the 2010-2022 time period.  
 10 Figure S3 provides a schematic overview of the workflow, Table S5 provides details on all of the  
 11 input data used in the ML model, Table S6 provides model performance metrics, and Table S7  
 12 provides the relative feature performance of the various input datasets.

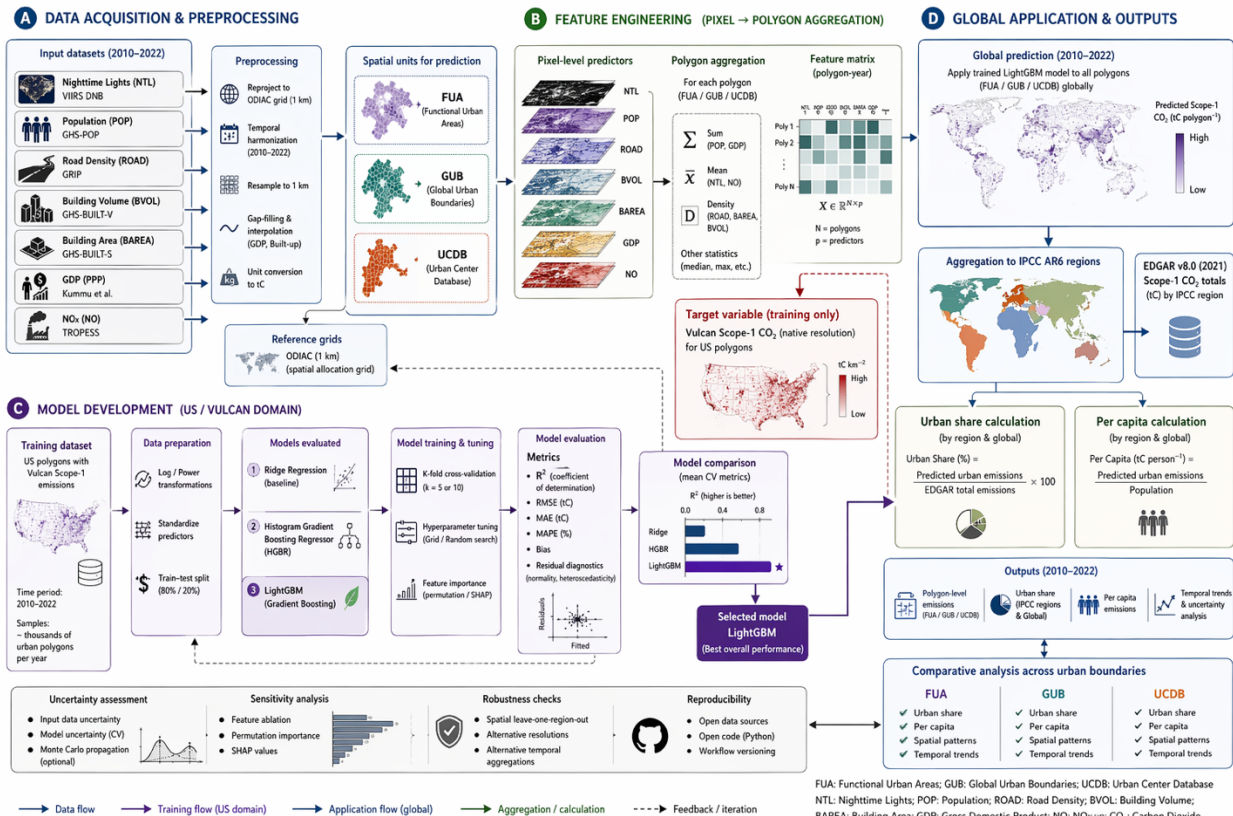

13  
 14 **Figure S3.** Workflow for the study.

1 **Table S5. Summary of datasets used in this study.**

| Variable                                | Data Source        | Format               | Resolution                | Temporal Coverage                               | Reference               |
|-----------------------------------------|--------------------|----------------------|---------------------------|-------------------------------------------------|-------------------------|
| Nighttime Lights (radiance)             | VIIRS DNB          | Raster (GeoTIFF)     | ~500 m                    | 2012–present (2010 & 2011 set to 2012 value)    | (Elvidge et al., 2017)  |
| Population count                        | GHS-POP            | Raster (GeoTIFF)     | 1 km                      | 2010, 2015, 2020, 2025 (interpolated to annual) | (Pesaresi et al., 2024) |
| Road Density                            | GRIP v4            | Raster (ASCII)       | ~5 km                     | Static                                          | (Meijer et al., 2018)   |
| Built Volume                            | GHS-BUILT-V        | Raster (GeoTIFF)     | 1 km                      | 2010, 2015, 2020, 2025 (interpolated to annual) | (Pesaresi et al., 2024) |
| Built Area                              | GHS-BUILT-S        | Raster (GeoTIFF)     | 1 km                      | 2010, 2015, 2020, 2025 (interpolated to annual) | (Pesaresi et al., 2024) |
| GDP (PPP-adjusted)                      | GDP grid           | NetCDF               | ~1 km                     | 2010-2015 (2016-2022 set to 2015 value)         | (Kummu et al., 2018)    |
| NOx: Nitrogen oxides emissions          | TROPESS reanalysis | NetCDF               | ~1.125°                   | 2005–2021 (2022 set to 2021 value)              | (Worden & others, 2022) |
| Territorial FFCO <sub>2</sub> emissions | Vulcan v4          | Point, line, polygon | Lowest: U.S. Census block | 2010–2022                                       | (Gurney et al., 2025)   |
| Global/regional emission totals         | EDGAR v8.0*        | Tabular              | Country                   | 1970–2022                                       | (Crippa et al., 2024)   |

2 \*for estimating the consumption-based urban share, the regional and global totals include both anthropogenic CO<sub>2</sub> and CH<sub>4</sub> from the EDGAR  
3 national/global results.

4 **Table S6. Light GBM machine learning model performance.**

| Boundary | R <sup>2</sup> | RMSE (MtC) | MAE (MtC) | Bias (MtC) | MPE | MAPE |
|----------|----------------|------------|-----------|------------|-----|------|
| GUB      | 0.82           | 2.0        | 1.4       | 1.8        | 3.4 | 2.8  |
| GCTB     | 0.82           | 2.01       | 1.3       | 1.7        | 3.3 | 2.8  |
| FUA      | 0.86           | 1.9        | 1.1       | 1.1        | 2.1 | 2.4  |
| FUGUB    | 0.81           | 2.0        | 1.3       | 1.3        | 3.1 | 2.7  |

5 RMSE: root mean square error  
6 MAE: mean absolute error  
7 BIAS: mean error  
8 MPE: mean percent error  
9 MAPE: mean absolute percent error

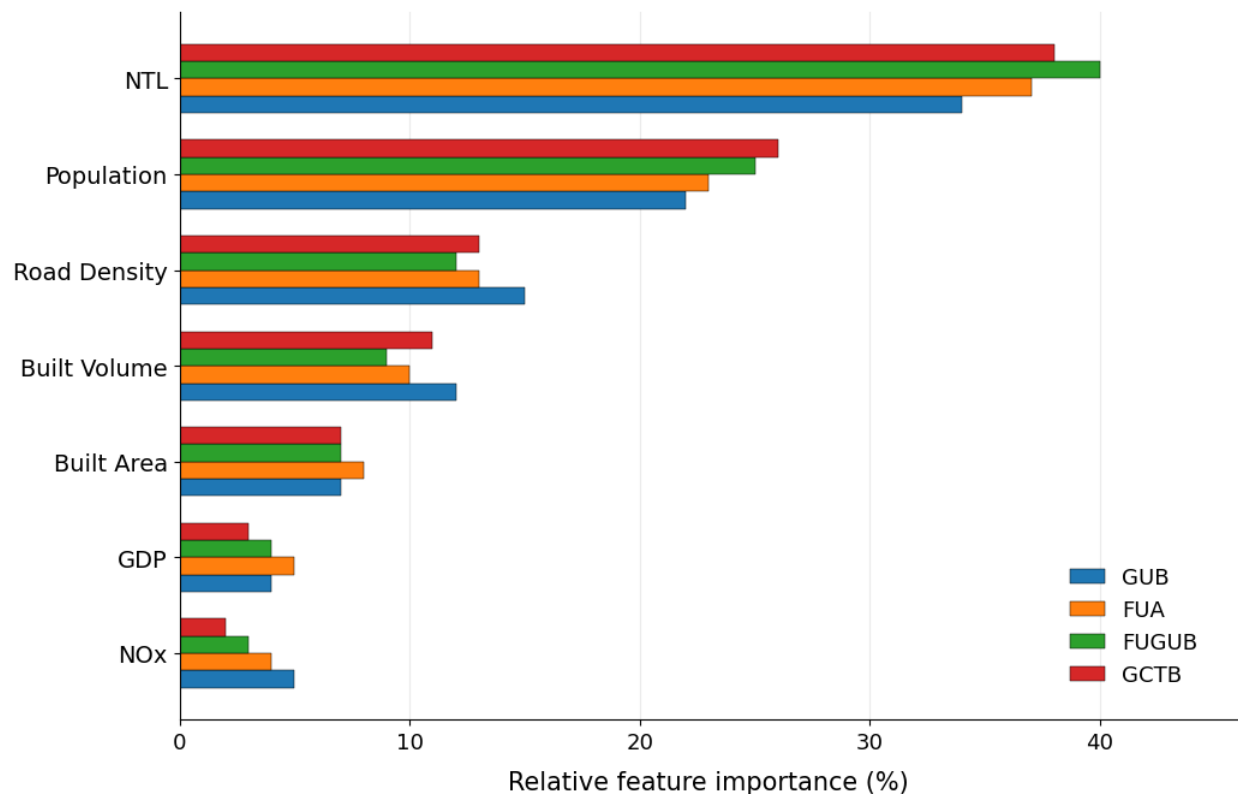

1  
2 **Figure S4.** Feature importance of the input variables to the Vulcan-UrbanML model trained on  
3 the four urban boundaries.

4 **Table S7.** IPCC AR6 6-region country listing.

| ISO | Name                             | AR6 6 Region                         |
|-----|----------------------------------|--------------------------------------|
| AFG | Afghanistan                      | Asia and developing Pacific          |
| ALA | Åland Islands                    | Developed Countries                  |
| ALB | Albania                          | Developed Countries                  |
| DZA | Algeria                          | Africa                               |
| ASM | American Samoa                   | Asia and developing Pacific          |
| AND | Andorra                          | Developed Countries                  |
| AGO | Angola                           | Africa                               |
| AIA | Anguilla                         | Latin America and Caribbean          |
| ATG | Antigua and Barbuda              | Latin America and Caribbean          |
| ARG | Argentina                        | Latin America and Caribbean          |
| ARM | Armenia                          | Eastern Europe and West-Central Asia |
| ABW | Aruba                            | Latin America and Caribbean          |
| AUS | Australia                        | Developed Countries                  |
| AUT | Austria                          | Developed Countries                  |
| AZE | Azerbaijan                       | Eastern Europe and West-Central Asia |
| BHS | Bahamas, The                     | Latin America and Caribbean          |
| BHR | Bahrain                          | Middle East                          |
| BGD | Bangladesh                       | Asia and developing Pacific          |
| BRB | Barbados                         | Latin America and Caribbean          |
| BLR | Belarus                          | Eastern Europe and West-Central Asia |
| BEL | Belgium                          | Developed Countries                  |
| BLZ | Belize                           | Latin America and Caribbean          |
| BEN | Benin                            | Africa                               |
| BMU | Bermuda                          | Developed Countries                  |
| BTN | Bhutan                           | Asia and developing Pacific          |
| BOL | Bolivia                          | Latin America and Caribbean          |
| BES | Bonaire, Sint Eustatius and Saba | Latin America and Caribbean          |

|     |                          |                                      |
|-----|--------------------------|--------------------------------------|
| BIH | Bosnia and Herzegovina   | Developed Countries                  |
| BWA | Botswana                 | Africa                               |
| BRA | Brazil                   | Latin America and Caribbean          |
| VGB | British Virgin Islands   | Latin America and Caribbean          |
| BRN | Brunei Darussalam        | Asia and developing Pacific          |
| BGR | Bulgaria                 | Developed Countries                  |
| BFA | Burkina Faso             | Africa                               |
| BDI | Burundi                  | Africa                               |
| CPV | Cabo Verde               | Africa                               |
| KHM | Cambodia                 | Asia and developing Pacific          |
| CMR | Cameroon                 | Africa                               |
| CAN | Canada                   | Developed Countries                  |
| CYM | Cayman Islands           | Latin America and Caribbean          |
| CAF | Central African Republic | Africa                               |
| TCD | Chad                     | Africa                               |
| CHL | Chile                    | Latin America and Caribbean          |
| CHN | China                    | Asia and developing Pacific          |
| COL | Colombia                 | Latin America and Caribbean          |
| COM | Comoros                  | Africa                               |
| COD | Congo, Dem. Rep.         | Africa                               |
| COG | Congo, Rep.              | Africa                               |
| COK | Cook Islands             | Asia and developing Pacific          |
| CRI | Costa Rica               | Latin America and Caribbean          |
| CIV | Côte d'Ivoire            | Africa                               |
| HRV | Croatia                  | Developed Countries                  |
| CUB | Cuba                     | Latin America and Caribbean          |
| CUW | Curaçao                  | Latin America and Caribbean          |
| CYP | Cyprus                   | Developed Countries                  |
| CZE | Czech Republic           | Developed Countries                  |
| DNK | Denmark                  | Developed Countries                  |
| DJI | Djibouti                 | Africa                               |
| DMA | Dominica                 | Latin America and Caribbean          |
| DOM | Dominican Republic       | Latin America and Caribbean          |
| ECU | Ecuador                  | Latin America and Caribbean          |
| EGY | Egypt, Arab Rep.         | Africa                               |
| SLV | El Salvador              | Latin America and Caribbean          |
| GNQ | Equatorial Guinea        | Africa                               |
| ERI | Eritrea                  | Africa                               |
| EST | Estonia                  | Developed Countries                  |
| ETH | Ethiopia                 | Africa                               |
| FJI | Fiji                     | Asia and developing Pacific          |
| FIN | Finland                  | Developed Countries                  |
| FRA | France                   | Developed Countries                  |
| GUF | French Guiana            | Latin America and Caribbean          |
| PYF | French Polynesia         | Asia and developing Pacific          |
| GAB | Gabon                    | Africa                               |
| GMB | Gambia, The              | Africa                               |
| GEO | Georgia                  | Eastern Europe and West-Central Asia |
| DEU | Germany                  | Developed Countries                  |
| GHA | Ghana                    | Africa                               |
| GIB | Gibraltar                | Developed Countries                  |
| GRC | Greece                   | Developed Countries                  |
| GRL | Greenland                | Developed Countries                  |
| GRD | Grenada                  | Latin America and Caribbean          |
| GLP | Guadeloupe               | Latin America and Caribbean          |
| GUM | Guam                     | Asia and developing Pacific          |
| GTM | Guatemala                | Latin America and Caribbean          |
| GGY | Guernsey                 | Developed Countries                  |
| GIN | Guinea                   | Africa                               |
| GNB | Guinea-Bissau            | Africa                               |
| GUY | Guyana                   | Latin America and Caribbean          |
| HTI | Haiti                    | Latin America and Caribbean          |
| HND | Honduras                 | Latin America and Caribbean          |
| HKG | Hong Kong SAR, China     | Asia and developing Pacific          |
| HUN | Hungary                  | Developed Countries                  |
| ISL | Iceland                  | Developed Countries                  |

|     |                           |                                      |
|-----|---------------------------|--------------------------------------|
| IND | India                     | Asia and developing Pacific          |
| IDN | Indonesia                 | Asia and developing Pacific          |
| IRN | Iran, Islamic Rep.        | Middle East                          |
| IRQ | Iraq                      | Middle East                          |
| IRL | Ireland                   | Developed Countries                  |
| IMN | Isle of Man               | Developed Countries                  |
| ISR | Israel                    | Middle East                          |
| ITA | Italy                     | Developed Countries                  |
| JAM | Jamaica                   | Latin America and Caribbean          |
| JPN | Japan                     | Developed Countries                  |
| JEY | Jersey                    | Developed Countries                  |
| JOR | Jordan                    | Middle East                          |
| KAZ | Kazakhstan                | Eastern Europe and West-Central Asia |
| KEN | Kenya                     | Africa                               |
| KIR | Kiribati                  | Asia and developing Pacific          |
| PRK | Korea, Dem. People's Rep. | Asia and developing Pacific          |
| KOR | Korea, Rep.               | Asia and developing Pacific          |
| KWT | Kuwait                    | Middle East                          |
| KGZ | Kyrgyz Republic           | Eastern Europe and West-Central Asia |
| LAO | Lao PDR                   | Asia and developing Pacific          |
| LVA | Latvia                    | Developed Countries                  |
| LBN | Lebanon                   | Middle East                          |
| LSO | Lesotho                   | Africa                               |
| LBR | Liberia                   | Africa                               |
| LYB | Libya                     | Africa                               |
| LIE | Liechtenstein             | Developed Countries                  |
| LTU | Lithuania                 | Developed Countries                  |
| LUX | Luxembourg                | Developed Countries                  |
| MAC | Macao SAR, China          | Asia and developing Pacific          |
| MKD | North Macedonia           | Eastern Europe and West-Central Asia |
| MDG | Madagascar                | Africa                               |
| MWI | Malawi                    | Africa                               |
| MYS | Malaysia                  | Asia and developing Pacific          |
| MDV | Maldives                  | Asia and developing Pacific          |
| MLI | Mali                      | Africa                               |
| MLT | Malta                     | Developed Countries                  |
| MHL | Marshall Islands          | Asia and developing Pacific          |
| MTQ | Martinique                | Latin America and Caribbean          |
| MRT | Mauritania                | Africa                               |
| MUS | Mauritius                 | Africa                               |
| MYT | Mayotte                   | Africa                               |
| MEX | Mexico                    | Latin America and Caribbean          |
| FSM | Micronesia, Fed. Sts.     | Asia and developing Pacific          |
| MDA | Moldova                   | Eastern Europe and West-Central Asia |
| MCO | Monaco                    | Developed Countries                  |
| MNG | Mongolia                  | Asia and developing Pacific          |
| MNE | Montenegro                | Developed Countries                  |
| MSR | Montserrat                | Latin America and Caribbean          |
| MAR | Morocco                   | Africa                               |
| MOZ | Mozambique                | Africa                               |
| MMR | Myanmar                   | Asia and developing Pacific          |
| NAM | Namibia                   | Africa                               |
| NRU | Nauru                     | Asia and developing Pacific          |
| NPL | Nepal                     | Asia and developing Pacific          |
| NLD | Netherlands               | Developed Countries                  |
| NCL | New Caledonia             | Asia and developing Pacific          |
| NZL | New Zealand               | Developed Countries                  |
| NIC | Nicaragua                 | Latin America and Caribbean          |
| NER | Niger                     | Africa                               |
| NGA | Nigeria                   | Africa                               |
| NIU | Niue                      | Asia and developing Pacific          |
| NOR | Norway                    | Developed Countries                  |
| OMN | Oman                      | Middle East                          |
| PAK | Pakistan                  | Asia and developing Pacific          |
| PLW | Palau                     | Asia and developing Pacific          |
| PAN | Panama                    | Latin America and Caribbean          |

|     |                          |                                      |
|-----|--------------------------|--------------------------------------|
| PNG | Papua New Guinea         | Asia and developing Pacific          |
| PRY | Paraguay                 | Latin America and Caribbean          |
| PER | Peru                     | Latin America and Caribbean          |
| PHL | Philippines              | Asia and developing Pacific          |
| POL | Poland                   | Developed Countries                  |
| PRT | Portugal                 | Developed Countries                  |
| PRI | Puerto Rico              | Latin America and Caribbean          |
| QAT | Qatar                    | Middle East                          |
| REU | Réunion                  | Africa                               |
| ROU | Romania                  | Developed Countries                  |
| RUS | Russian Federation       | Eastern Europe and West-Central Asia |
| RWA | Rwanda                   | Africa                               |
| WSM | Samoa                    | Asia and developing Pacific          |
| SMR | San Marino               | Developed Countries                  |
| STP | São Tomé and Príncipe    | Africa                               |
| SAU | Saudi Arabia             | Middle East                          |
| SEN | Senegal                  | Africa                               |
| SRB | Serbia                   | Developed Countries                  |
| SYC | Seychelles               | Africa                               |
| SLE | Sierra Leone             | Africa                               |
| SGP | Singapore                | Asia and developing Pacific          |
| SVK | Slovak Republic          | Developed Countries                  |
| SVN | Slovenia                 | Developed Countries                  |
| SLB | Solomon Islands          | Asia and developing Pacific          |
| SOM | Somalia                  | Africa                               |
| ZAF | South Africa             | Africa                               |
| SSD | South Sudan              | Africa                               |
| ESP | Spain                    | Developed Countries                  |
| LKA | Sri Lanka                | Asia and developing Pacific          |
| SDN | Sudan                    | Africa                               |
| SUR | Suriname                 | Latin America and Caribbean          |
| SWE | Sweden                   | Developed Countries                  |
| CHE | Switzerland              | Developed Countries                  |
| SYR | Syrian Arab Republic     | Middle East                          |
| TWN | Taiwan, China            | Asia and developing Pacific          |
| TJK | Tajikistan               | Eastern Europe and West-Central Asia |
| TZA | Tanzania                 | Africa                               |
| THA | Thailand                 | Asia and developing Pacific          |
| TLS | Timor-Leste              | Asia and developing Pacific          |
| TGO | Togo                     | Africa                               |
| TON | Tonga                    | Asia and developing Pacific          |
| TTO | Trinidad and Tobago      | Latin America and Caribbean          |
| TUN | Tunisia                  | Africa                               |
| TUR | Turkey                   | Developed Countries                  |
| TKM | Turkmenistan             | Eastern Europe and West-Central Asia |
| TCA | Turks and Caicos Islands | Latin America and Caribbean          |
| TUV | Tuvalu                   | Asia and developing Pacific          |
| UGA | Uganda                   | Africa                               |
| UKR | Ukraine                  | Developed Countries                  |
| ARE | United Arab Emirates     | Middle East                          |
| GBR | United Kingdom           | Developed Countries                  |
| USA | United States            | Developed Countries                  |
| URY | Uruguay                  | Latin America and Caribbean          |
| UZB | Uzbekistan               | Eastern Europe and West-Central Asia |
| VUT | Vanuatu                  | Asia and developing Pacific          |
| VEN | Venezuela, RB            | Latin America and Caribbean          |
| VNM | Vietnam                  | Asia and developing Pacific          |
| VIR | Virgin Islands (U.S.)    | Latin America and Caribbean          |
| PSE | West Bank and Gaza       | Middle East                          |
| ESH | Western Sahara           | Africa                               |
| YEM | Yemen, Rep.              | Middle East                          |
| ZMB | Zambia                   | Africa                               |
| ZWE | Zimbabwe                 | Africa                               |

1 **References**

- 2 Bai, M., Zhang, X., Ai, W., Jing, X., & Liu, L. (2025). A high-resolution global annual city and  
3 town boundaries dataset (2000–2022) derived from GLC\_FCS30D product. *Scientific*  
4 *Data*, 13(1), 50. <https://doi.org/10.1038/s41597-025-06368-9>
- 5 Crippa, M., Guizzardi, D., Pagani, F., Schiavina, M., Melchiorri, M., Pisoni, E., Graziosi, F.,  
6 Muntean, M., Maes, J., Dijkstra, L., Van Damme, M., Clarisse, L., & Coheur, P. (2024).  
7 Insights into the spatial distribution of global, national, and subnational greenhouse gas  
8 emissions in the Emissions Database for Global Atmospheric Research (EDGAR v8.0).  
9 *Earth System Science Data*, 16(6), 2811–2830. [https://doi.org/10.5194/essd-16-2811-](https://doi.org/10.5194/essd-16-2811-2024)  
10 2024
- 11 Elvidge, C. D., Baugh, K., Zhizhin, M., Hsu, F. C., & Ghosh, T. (2017). VIIRS night-time lights.  
12 *International Journal of Remote Sensing*, 38(21), 5860–5879.
- 13 Gurney, K. R., Dass, P., Kato, A., Gawuc, L., Aslam, B., & Sun, H. (2025). Vulcan version 4.0  
14 high-resolution annual carbon dioxide emissions in the US for 2010–2022. *Scientific*  
15 *Data*, 12(1), 1946.
- 16 Kummu, M., Taka, M., & Guillaume, J. H. A. (2018). Gridded global datasets for GDP and HDI  
17 over 1990–2015. *Scientific Data*, 5, 180004.
- 18 Li, X., Gong, P., Zhou, Y., Wang, J., Bai, Y., Chen, B., & Zhu, Z. (2020). Mapping global urban  
19 boundaries from the global artificial impervious area (GAIA) data. *Environmental*  
20 *Research Letters*, 15(9), 094044.
- 21 Meijer, J. R., Huijbregts, M. A. J., Schotten, K. C. G. J., & Schipper, A. M. (2018). Global  
22 patterns of current and future road infrastructure. *Environmental Research Letters*, 13(6),  
23 064006.

1 Melchiorri, M., Freire, S., Schiavina, M., Florczyk, A., Corbane, C., Maffenini, L., Pesaresi, M.,  
2 Politis, P., Szabo, F., Ehrlich, D., Tommasi, P., Airaghi, D., Zanchetta, L., & Kemper, T.  
3 (2024). The Multi-temporal and Multi-dimensional Global Urban Centre Database to  
4 Delineate and Analyse World Cities. *Scientific Data*, *11*(1), 82.  
5 <https://doi.org/10.1038/s41597-023-02691-1>

6 Moreno-Monroy, A. I., Schiavina, M., & Veneri, P. (2021). Metropolitan areas in the world.  
7 Delineation and population trends. *Journal of Urban Economics*, *125*, 103242.  
8 <https://doi.org/10.1016/j.jue.2020.103242>

9 Nangini, C., Peregon, A., Ciais, P., Weddige, U., Vogel, F., Wang, J., Bréon, F.-M. M., Bachra, S.,  
10 Wang, Y., Gurney, K., Yamagata, Y., Appleby, K., Telahoun, S., Canadell, J. G., Grüber,  
11 A., Dhakal, S., & Creutzig, F. (2019). A global dataset of CO2 emissions and ancillary  
12 data related to emissions for 343 cities. *Scientific Data*, *6*, 1–29.  
13 <https://doi.org/10.1038/sdata.2018.280>

14 Pesaresi, M., Politis, P., Goch, K., & Kemper, T. (2024). *Operational procedure for multi-*  
15 *temporal assessment of built-up surfaces and volumes in GHSL R2023A*. European  
16 Commission.

17 Schiavina, M., Melchiorri, M., & Pesaresi, M. (2023). *GHS-SMOD R2023A - GHS settlement*  
18 *layers, application of the Degree of Urbanisation methodology (stage I) to GHS-POP*  
19 *R2023A and GHS-BUILT-S R2023A, multitemporal (1975-2030)* [Dataset]. European  
20 Commission, Joint Research Centre (JRC). [https://doi.org/10.2905/A0DF7A6F-49DE-](https://doi.org/10.2905/A0DF7A6F-49DE-46EA-9BDE-563437A6E2BA)  
21 [46EA-9BDE-563437A6E2BA](https://doi.org/10.2905/A0DF7A6F-49DE-46EA-9BDE-563437A6E2BA)

22 Worden, H. M. & others. (2022). The TROPES atmospheric reanalysis. *Journal of Geophysical*  
23 *Research: Atmospheres*.
